# Supplementary material
Source: Springer Nature journal article supplement (https://www.springermedizin.de/resource/supplementary/13690_2011_26_MOESM1_ESM.pdf/9422428)

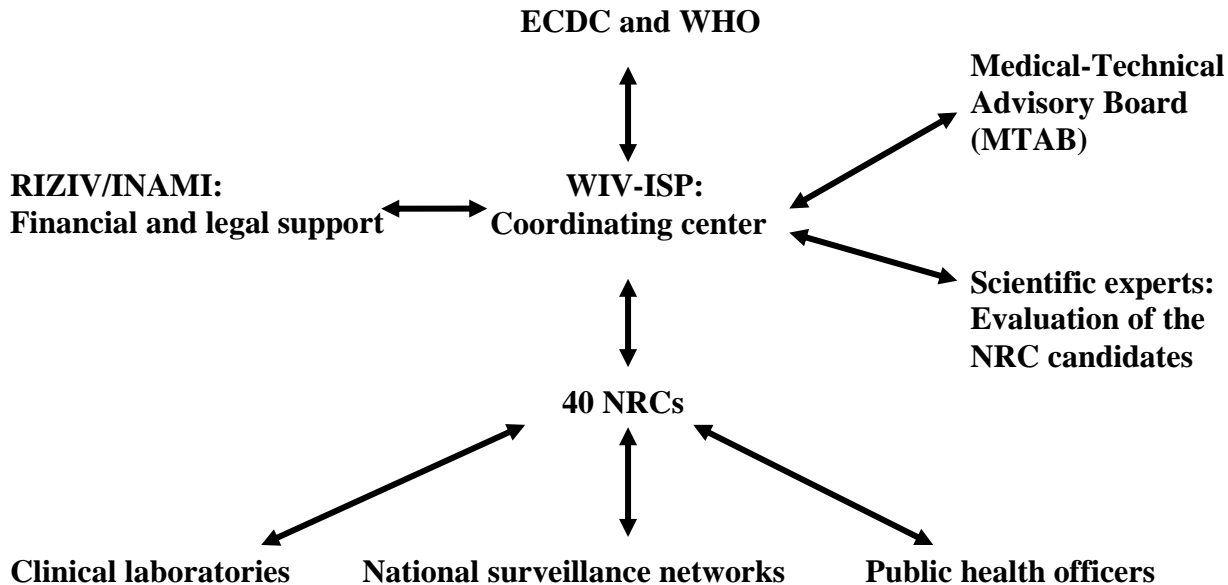

Supplement: MOESM1 [file 9422428]
